# Supplementary material for: Benchmarking tools for detecting longitudinal differential expression in proteomics data allows establishing a robust reproducibility optimization regression approach
Source: PubMed Central journal article supplement (PMC9780321; doi:10.1038/s41467-022-35564-z), 2022-12-22
Supplement: 41467_2022_35564_MOESM1_ESM.pdf [file 41467_2022_35564_MOESM1_ESM.pdf]

# **Benchmarking tools for detecting longitudinal differential expression in proteomics data allows establishing a robust reproducibility optimization regression approach**

Tommi Välikangas, Tomi Suomi, Courtney E. Chandler, Alison J Scott, Bao Q. Tran, Robert K. Ernst, David R. Goodlett, Laura L. Elo

## **Supplementary Information**

## Supplementary Note

### Robustness of the new method RoIDE

While the default usage of RoIDE is very easy, the user is allowed full control of all the parameters, including the polynomial degree in the RegROTS and PolyReg modules, the use of random effects for the individual baseline or slope in the PolyReg module, and the number of bootstraps in the RegROTS and DiffROTS modules. To evaluate the sensitivity of RoIDE to these parameters, we explored how the different degrees for the RegROTS and PolyReg modules and the use of a random effect for the individual baseline in the PolyReg module affected the performance of RoIDE in the semi-simulated spike-in datasets (Supplementary Figure 5). Regardless of the used degrees for RegROTS and PolyReg or the model type for the PolyReg module, only slight variations were observed and the performance of RoIDE remained excellent despite the specific parameters used. Importantly, using the default settings, RoIDE automatically selected the best performing parameter combination, supporting the utility of the automatic parameter selection approach (Supplementary Figure 5). Similarly, increasing the number of bootstraps beyond the default value of 100 for the RegROTS and DiffROTS modules did not have a major effect on the performance of the method.

To provide a more refined evaluation of the RoIDE methodology, we assessed in more detail the effect of the reproducibility-optimization with ROTS as well as the combination of multiple rankings on the performance. First, to demonstrate the benefits of ROTS, we composed a variant of the RegROTS module utilizing a standard one-way Analysis of Variance (ANOVA) instead of ROTS and extensively compared this RegANOVA method to the RegROTS module in the 1920 semi-simulated datasets. The comparisons clearly demonstrated the benefits of applying ROTS over ANOVA with considerable performance gains ( $p < 10^{-6}$  in all scenarios, Supplementary Figure 8).

Although already the RegROTS module alone performed very well, the use of all the complementary modules (RegROTS, DiffROTS and PolyReg) increased the performance further (Supplementary Figure 8). Ultimately, the combination of the diverse approaches through rank products stabilizes the composite method and allows for consistent excellent performance in diverse datasets. To further investigate the effect of combining multiple approaches, we also combined three established diverse methods Timecourse, Limma and MaSigPro using a similar ranking and rank product approach as in RoIDE in two different types of datasets, the semi-simulated SGSDS full and the UPS1 Mix full datasets (Supplementary Figure 9). Indeed, the composite approach of Timecourse, Limma and MaSigPro performed relatively well in both types of dataset. However, in the UPS1 Mix datasets, the performance was significantly reduced, when compared to Timecourse alone ( $p < 10^{-15}$ , Supplementary Figure 9). This demonstrates how the combination of multiple approaches does not always improve the results but can also reduce the performance, highlighting the importance of careful consideration regarding such combination.

Finally, to comprehensively evaluate the simulation-based estimation of the significance values and the false discovery rate control of RoIDE, we explored the numbers of false discoveries in 600 varying datasets under the null hypothesis. For this purpose, 200 completely random (noise) datasets were generated similarly as the UPS1-based semi-simulated datasets but with random draws of all values from a same normal distribution. In addition to such completely random datasets, 200 protein-wise random datasets were generated using protein-wise normal distributions. Thus, each protein had a distinct protein specific mean and standard deviation, following those from the corresponding semi-simulated spike-in dataset based on real experimental data. As both the completely random datasets and the protein-wise datasets were generated randomly, they did not contain any clear patterns. Therefore, we also generated datasets where there were clear patterns for some proteins in the data, but this pattern did not differ between the two conditions. For this, 200 UPS1-based semi-

simulated datasets were randomly selected and only the samples from one condition were used, while the other condition was generated by replicating the samples from the first condition with random noise from normal distribution. In each dataset type, datasets with no missing values, and with 5%, 10% and 15% of missing values were generated. Our results demonstrate the ability of the simulation approach to effectively estimate the significance values and control the number of false discoveries (Supplementary Table 3). In the absence of true longitudinal differential expression signal in the data, false detections were very rare, confirming the effectiveness of RoIDE in controlling false discoveries.

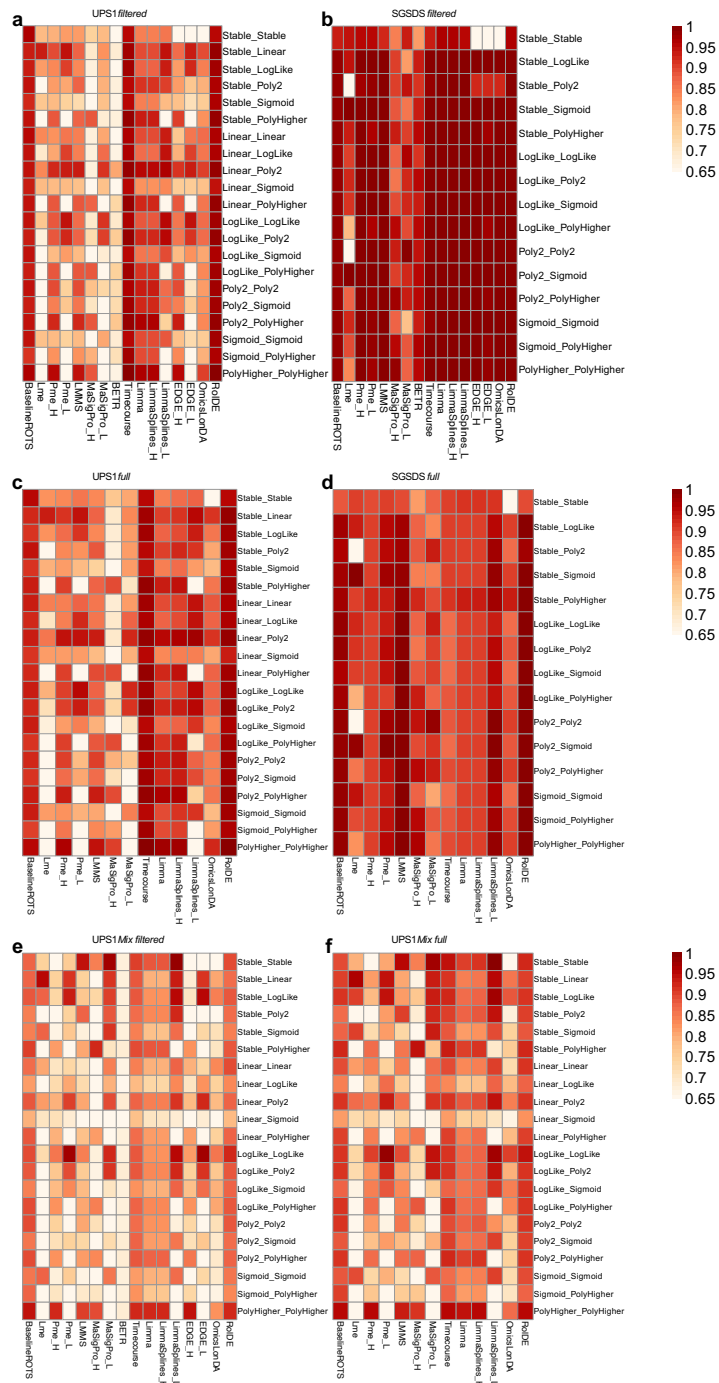

**Supplementary Figure 1.** Performance of the different methods (columns) across the trend difference categories (rows) in the semi-simulated spike-in datasets. **(a)** UPS1 filtered (n=300 datasets), **(b)** SGSDS filtered (n=210 datasets), **(c)** UPS1 full (n=300 datasets), **(d)** SGSDS full (n=210 datasets), **(e)** UPS1 Mix filtered (n=300 datasets), **(f)** UPS1 Mix full (n=300 datasets). The methods were examined in their ability to detect true known longitudinal differential expression using receiver operating characteristic (ROC) analysis across datasets with varying longitudinal trend differences in the spike-in proteins (3 replicate samples per condition). The partial areas under the ROC curves (pAUC) between the specificity of 1 and 0.9 were used to measure the performance of the methods. The interquartile range (IQR) mean pAUCs are presented with the colour scale. Source data are provided as a Source Data file.

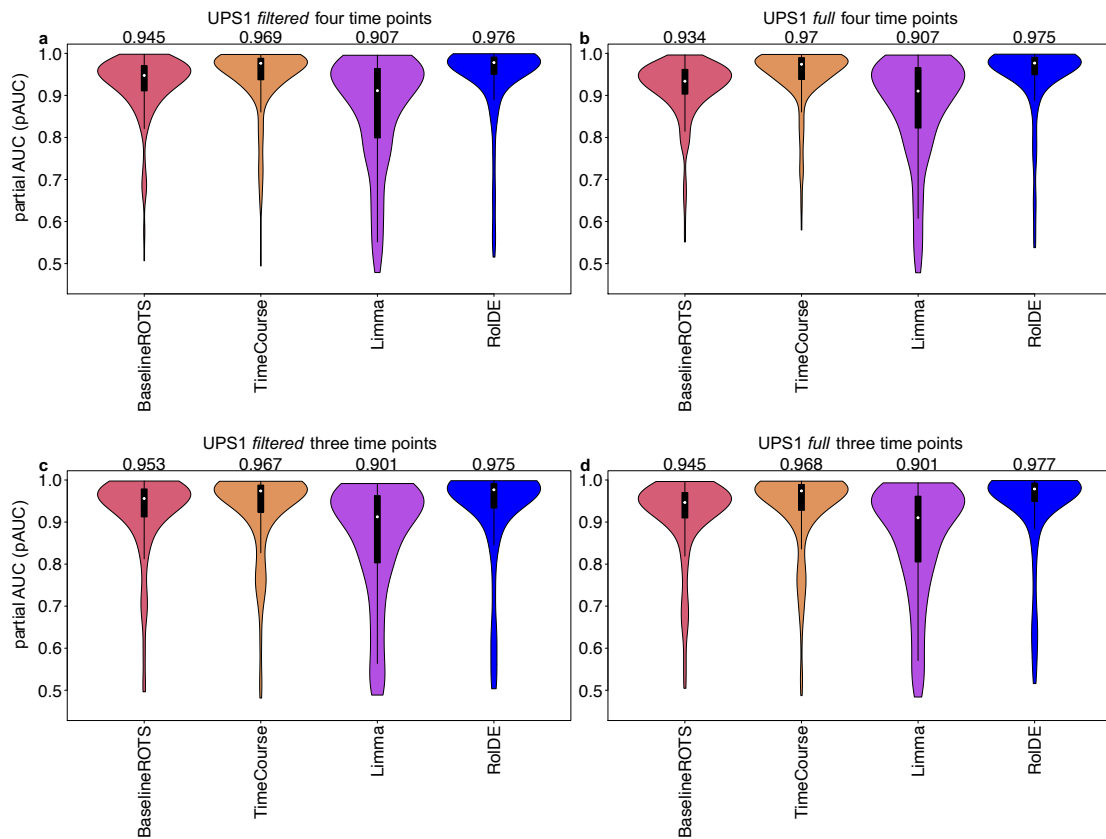

**Supplementary Figure 2.** Performance of the selected best-performing methods RoIDE, Timecourse, Limma, and the baseline ROTS in semi-simulated spike-in datasets with only three or four time points. **(a)** UPS1 filtered with four time points ( $n=300$  datasets), **(b)** UPS1 full with four time points ( $n=300$  datasets), **(c)** UPS1 filtered with three time points ( $n=300$  datasets), **(d)** UPS1 full with three time points ( $n=300$  datasets). The methods were examined in their ability to detect true known longitudinal differential expression using receiver operating characteristic (ROC) analysis across datasets with varying longitudinal trend differences in the spike-in proteins (3 replicate samples per condition). The partial areas under the ROC curves (pAUC) between the specificity of 1 and 0.9 were used to measure the performance of the methods. The violin plots display the distribution of pAUCs for each method, including median (white circle), interquartile range (IQR) from the first to third quartile (black box), and  $1.5 \times$  IQR (whiskers). The IQR mean pAUC for each method is shown above the violin. Each method is shown with a unique colour. Source data are provided as a Source Data file.

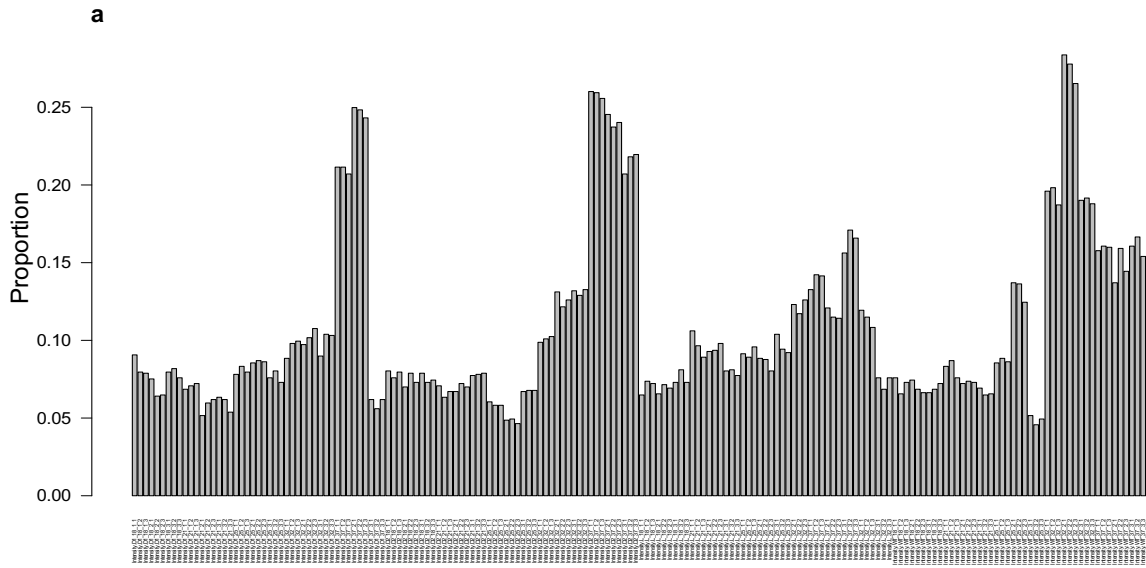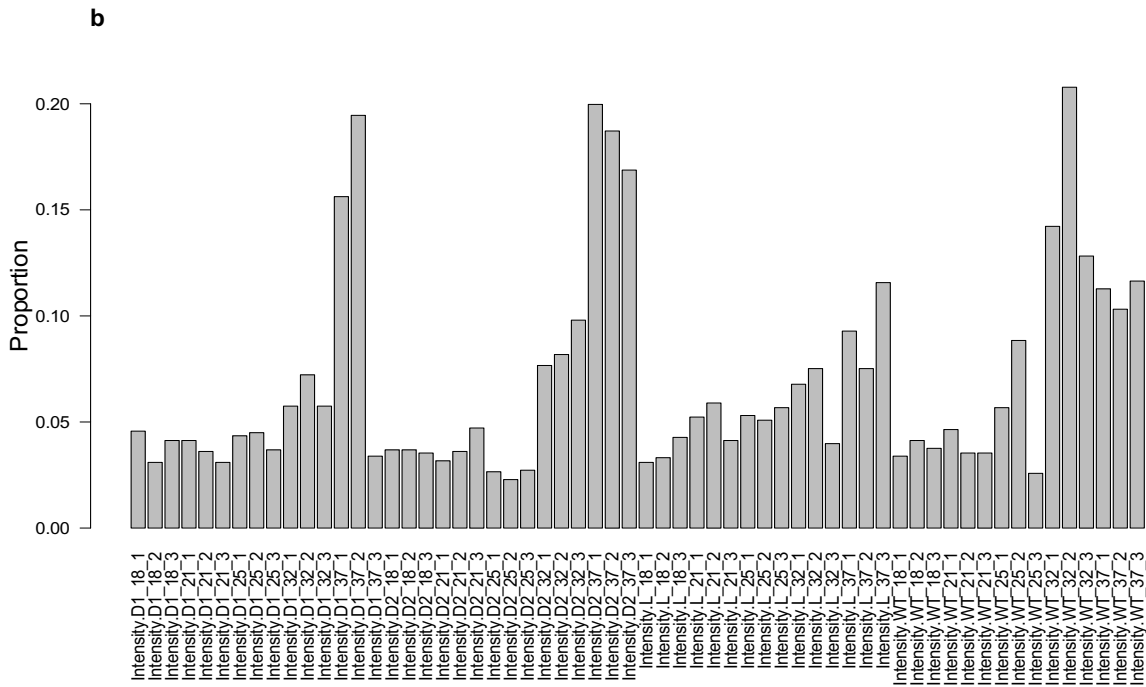

**Supplementary Figure 3.** Missing value proportions in the samples of the *Francisella tularensis* subspecies *novicida* proteomics dataset. Missing value proportions in **(a)** all the samples, and **(b)** after averaging over the technical replicates for a biological replicate. Source data are provided as a Source Data file.

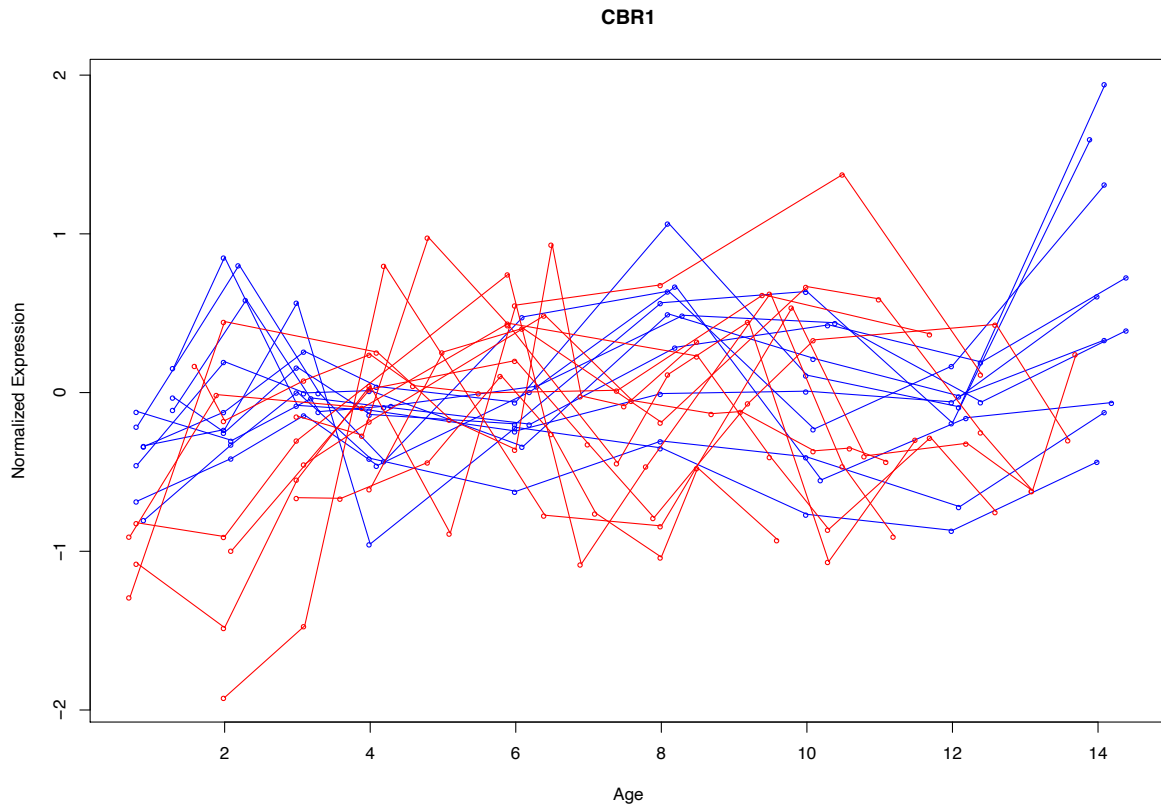

**Supplementary Figure 4.** A significant finding (FDR = 0.04) by the original study by Liu et al. in their differential expression analysis of the longitudinal blood plasma proteome of 11 children developing type 1 diabetes (red lines) and 10 matched controls (blue lines), carbonyl reductase 1 (CBR1). With RoIDE, CBR1 had FDR of 0.07 for longitudinal differential expression. Source data are provided as a Source Data file.

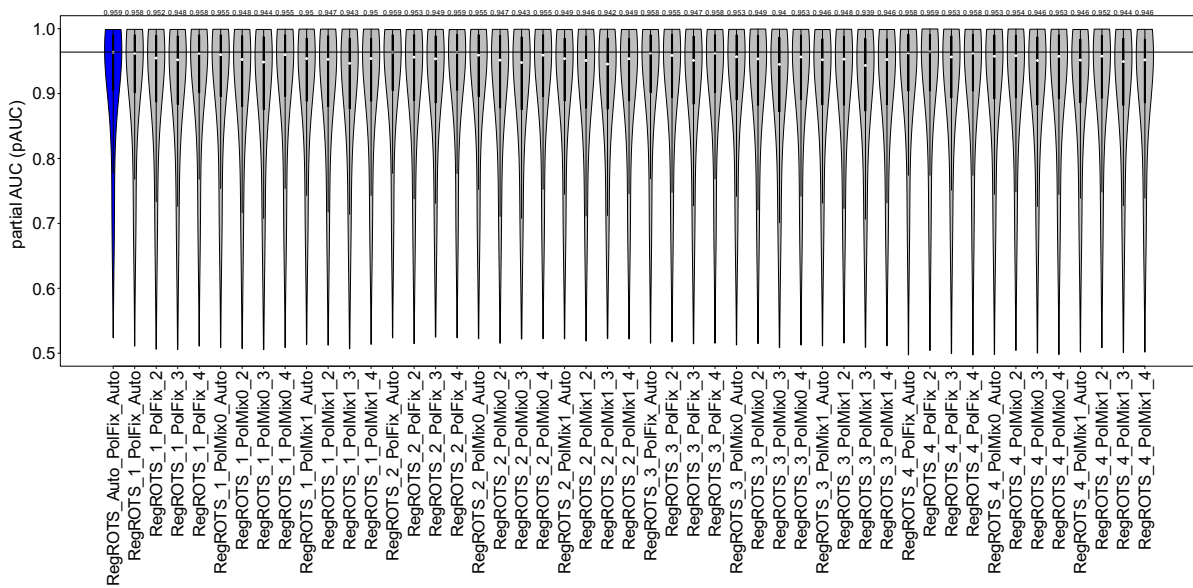

**Supplementary Figure 5.** Performance of the proposed new method RoIDE using different parameters for its modules. The polynomial degrees in the RegROTS and PolyReg modules were varied from 1 to 4. In addition, the model type for the PolyReg module was varied, including only fixed models (PolFix), mixed models with a random effect for the individual baseline (PolMix0), and mixed models with random effects for the individual baseline and slope (PolMix1). The performance of RoIDE with the different parameters was examined over 1920 semi-simulated spike-in datasets (300 UPS1 filtered, 300 UPS1 full, 300 UPS1 Mix filtered, 300 UPS1 Mix full, 210 SGSDS filtered, 210 SGSDS full, and 300 CPTAC full datasets) using receiver operating characteristic (ROC) analysis with varying longitudinal trend differences between the conditions in the spike-in proteins (3 replicate samples per condition). The partial areas under the ROC curves (pAUC) between the specificity of 1 and 0.9 were used to measure the performance of the parameter settings. The violin plots display the distribution of pAUCs for each setting, including median (white circle), interquartile range (IQR) from the first to third quartile (black box), and 1.5\* IQR (whiskers). The IQR mean pAUCs are shown above the violins. The horizontal black line represents the IQR mean pAUC of the default approach of RoIDE that determines the degrees automatically. Source data are provided as a Source Data file.



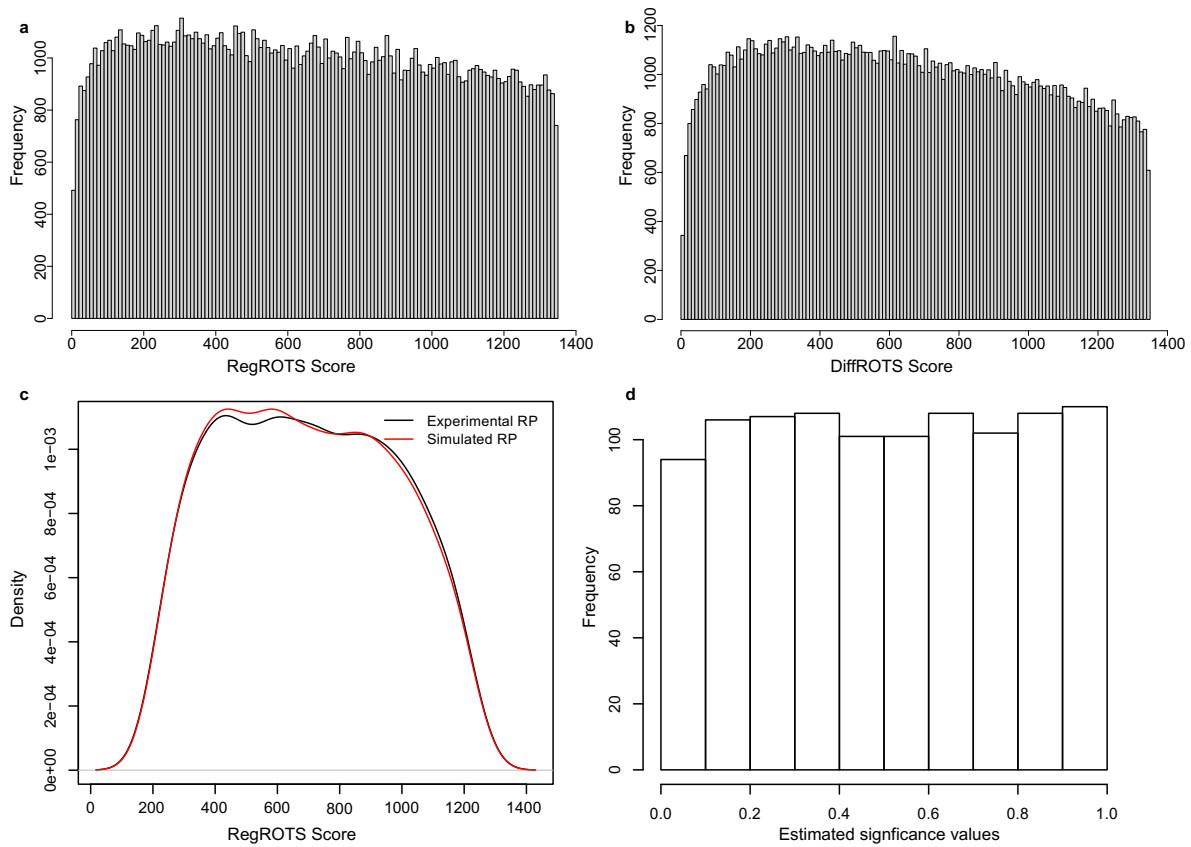

**Supplementary Figure 6.** Empirical distributions of specific RoIDE modules under the null hypothesis and example of significance value estimation in RoIDE. **(a)** The empirical distribution of the RegROTS scores  $S_{RegROTS}$  under the null hypothesis. **(b)** The empirical distribution of the DiffROTS scores  $S_{DiffROTS}$  under the null hypothesis. To determine the empirical distributions, completely random (noise) datasets were generated on the basis of the UPS1 semi-simulated datasets with random draws of the values from a normal distribution. **(c)** Distribution of the experimental and simulated internal rank products for the RegROTS module in a simulated random longitudinal data and **(d)** the corresponding estimated significance values for RoIDE in the same data. Similar to the UPS1-based datasets, the random dataset contained two conditions, five time points, and three replicates in each condition.

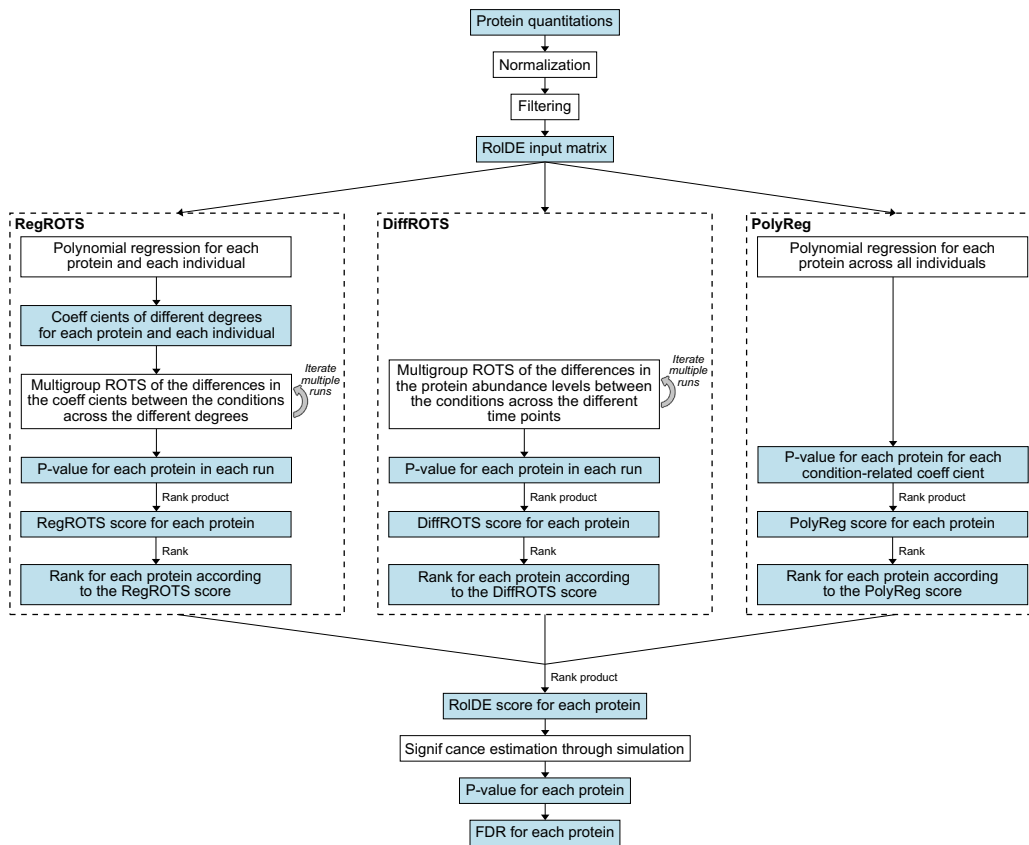

**Supplementary Figure 7.** The RoIDE workflow. In case of non-aligned time points, the DiffROTS module is slightly adjusted.

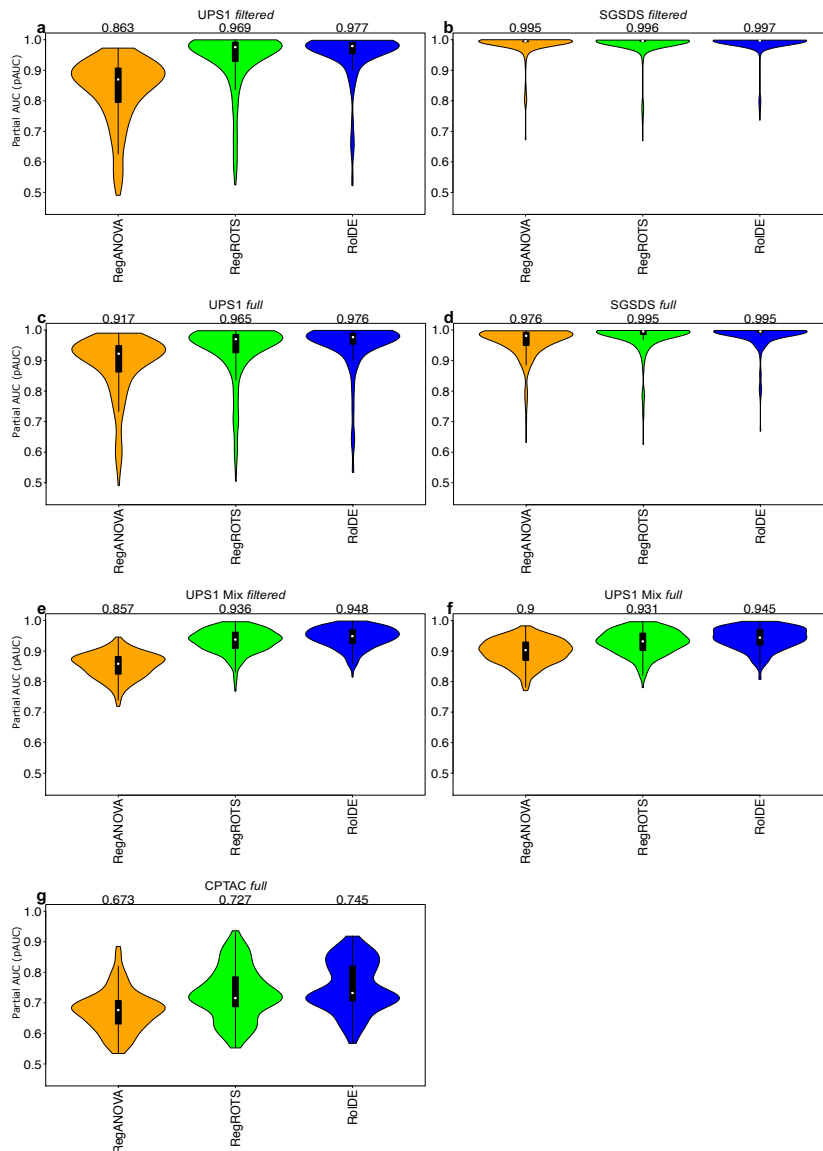

**Supplementary Figure 8.** Performance of the RegROTS module, the RegANOVA approach, and the proposed new method RoIDE in the semi-simulated spike-in datasets. **(a)** UPS1 filtered (n=300 datasets), **(b)** SGSDS filtered (n=210 datasets), **(c)** UPS1 full (n=300 datasets), **(d)** SGSDS full (n=210 datasets), **(e)** UPS1 Mix filtered (n=300 datasets), **(f)** UPS1 Mix full (n=300 datasets), **(g)** CPTAC full (n=300 datasets). The methods were examined in their ability to detect true known longitudinal differential expression using receiver operating characteristic (ROC) analysis across datasets with varying longitudinal trend differences in the spike-in proteins (3 replicate samples per condition). The partial areas under the ROC curves (pAUC) between the specificity of 1 and 0.9 were used to measure the performance of the methods. The violin plots display the distribution of pAUCs for each method, including median (white circle), interquartile range (IQR) from the first to third quartile (black box), and 1.5\* IQR (whiskers). The IQR mean pAUC for each method is shown above the violin. Each method is shown with a unique colour. In the RegANOVA approach, the Reproducibility Optimized Test Statistic (ROTS) was replaced with the standard One-Way Analysis of Variance (ANOVA) approach to evaluate the benefits of the ROTS approach. Source data are provided as a Source Data file. Source data are provided as a Source Data file.

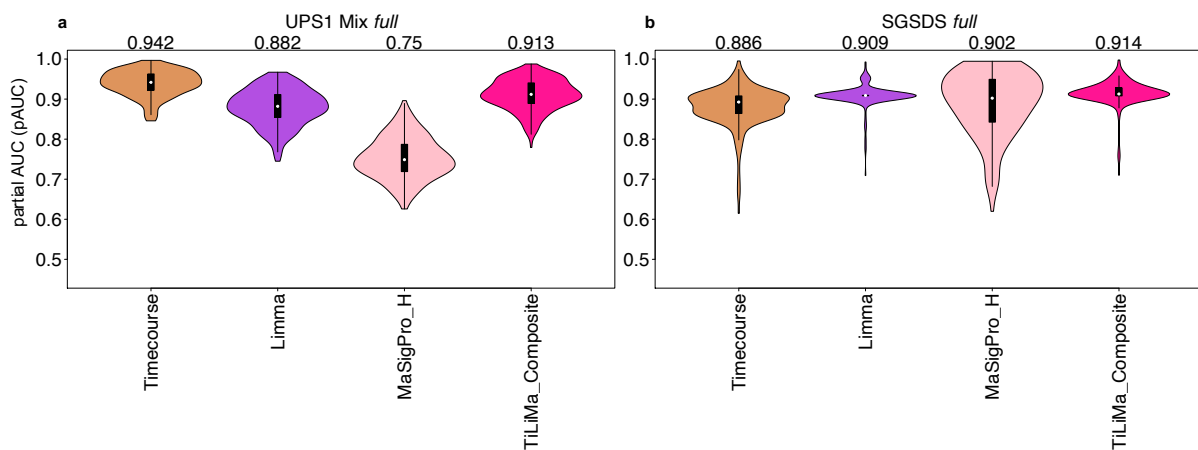

**Supplementary Figure 9.** Performance of Timecourse, Limma and MaSigPro and their composite approach in the semi-simulated spike-in datasets. **(a)** UPS1 Mix full (n=300 datasets), **(b)** SGSDS full (n=210 datasets). The methods were examined in their ability to detect true known longitudinal differential expression using receiver operating characteristic (ROC) analysis across datasets with varying longitudinal trend differences in the spike-in proteins (3 replicate samples per condition). The partial areas under the ROC curves (pAUC) between the specificity of 1 and 0.9 were used to measure the performance of the methods. The violin plots display the distribution of pAUCs for each method, including median (white circle), interquartile range (IQR) from the first to third quartile (black box), and 1.5\* IQR (whiskers). The IQR mean pAUC for each method is shown above the violin. Each method is shown with a unique colour. The three methods were combined using rank product similarly as in the RoIDE approach. Source data are provided as a Source Data file.

**Supplementary Table 1.** All unique proteins in the KEGG Lipopolysaccharide synthesis pathway (ftn00540) complemented with unique proteins from the associated Lipopolysaccharide biosynthesis knockout pathway (ko00540). Proteins belonging to the KEGG Lipopolysaccharide synthesis pathway (ftn00540) are highlighted. The included pathway proteins used for the gene set enrichment analysis (GSEA) in different comparisons are shown in columns.

| Entry  | Entry_name   | Status     | Gene_names              | Gene_names_primary | Included in GSEA, WT vs. L comparison | Included in GSEA, WT vs. D2 comparison | Included in GSEA, WT vs. D1 comparison |
|--------|--------------|------------|-------------------------|--------------------|---------------------------------------|----------------------------------------|----------------------------------------|
| A0Q7Y0 | A0Q7Y0_FRATN | unreviewed | lpxA FTN_1478           | lpxA               |                                       |                                        | x                                      |
| A0Q4B0 | A0Q4B0_FRATN | unreviewed | lpxC FTN_0165           | lpxC               |                                       |                                        |                                        |
| A0Q7Y2 | A0Q7Y2_FRATN | unreviewed | lpxD FTN_1480           | lpxD               |                                       |                                        | x                                      |
| A0Q4E5 | A0Q4E5_FRATN | unreviewed | lpxD FTN_0200           | lpxD               |                                       | x                                      | x                                      |
| A0Q5A8 | A0Q5A8_FRATN | unreviewed | lpxH FTN_0528           | lpxH               | x                                     | x                                      | x                                      |
| A0Q7X9 | LPXB_FRATN   | reviewed   | lpxB FTN_1477           | lpxB               |                                       |                                        |                                        |
| A0Q8A0 | LPXK_FRATN   | reviewed   | lpxK FTN_1605           | lpxK               |                                       | x                                      |                                        |
| A0Q788 | A0Q788_FRATN | unreviewed | kpsF FTN_1222           | kpsF               | x                                     | x                                      | x                                      |
| A0Q5J1 | KDSA_FRATN   | reviewed   | kdsA FTN_0611           | kdsA               | x                                     | x                                      | x                                      |
| A0Q6C8 | A0Q6C8_FRATN | unreviewed | yrbl FTN_0905           | yrbl               |                                       | x                                      |                                        |
| A0Q5R0 | KDSB_FRATN   | reviewed   | kdsB FTN_0683           | kdsB               | x                                     | x                                      | x                                      |
| A0Q7X2 | A0Q7X2_FRATN | unreviewed | kdtA FTN_1469           | kdtA               |                                       |                                        |                                        |
| A0Q418 | A0Q418_FRATN | unreviewed | FTN_0072                | #N/A               |                                       |                                        |                                        |
| A0Q417 | A0Q417_FRATN | unreviewed | FTN_0071                | #N/A               | x                                     |                                        |                                        |
| A0Q450 | A0Q450_FRATN | unreviewed | FTN_0104                | #N/A               |                                       |                                        |                                        |
| A0Q504 | A0Q504_FRATN | unreviewed | lpxE FTN_0416           | lpxE               | x                                     | x                                      | x                                      |
| A0Q576 | A0Q576_FRATN | unreviewed | kdoH1 FTN_0495          | kdoH1              |                                       | x                                      |                                        |
| A0Q4N6 | LPXF_FRATN   | reviewed   | lpxF FTN_0295 AW25_1746 | lpxF               | x                                     | x                                      | x                                      |

**Supplementary Table 2.** The detected longitudinally differentially expressed proteins at false discovery rate (FDR) of 0.05 using the Robust longitudinal Differential Expression method RoIDE in the longitudinal type 1 diabetes blood plasma proteomics data of Liu et al.

| Feature ID     | RoIDE Rank Product | Estimated false discovery rate |
|----------------|--------------------|--------------------------------|
| TRFE (P02787)  | 15.4               | $<10^{-16}$                    |
| SCLT1 (Q96NL6) | 18.6               | $<10^{-16}$                    |
| CGRE1 (Q99674) | 30.0               | $<10^{-16}$                    |
| K1H1 (Q15323)  | 38.0               | $<10^{-16}$                    |
| SAA1 (P0DJ18)  | 42.5               | $<10^{-16}$                    |
| A0A0G2JH38     | 53.4               | 0.0006                         |
| TSK (Q8WUA8)   | 55.5               | 0.0006                         |
| AMYP (P04746)  | 59.8               | 0.0008                         |
| LY66F (Q5SQ64) | 60.8               | 0.0008                         |
| KRT86 (O43790) | 63.9               | 0.0008                         |
| RAB2A (P61019) | 64.6               | 0.0008                         |
| PA1B3 (Q15102) | 72.7               | 0.0017                         |
| ASAP1 (Q9ULH1) | 75.8               | 0.0035                         |
| FAT4 (Q6V0I7)  | 80.8               | 0.0057                         |
| CISY (O75390)  | 86.5               | 0.0279                         |

**Supplementary Table 3.** False discovery rate (FDR) with RoIDE in various types of datasets under the null hypothesis, including 200 completely random (noise) datasets, 200 protein-wise random datasets, and 200 datasets with clear patterns for some proteins but without differences between the two conditions. For each dataset type, datasets with no missing values, and datasets with 5%, 10% and 15% of missing values were generated. Median and range are shown.

| <b>Dataset Type (under H0)</b>            | <b>FDR range</b> | <b>FDR median</b> |
|-------------------------------------------|------------------|-------------------|
| Completely random - no missing values     | 0 - 0.001        | 0                 |
| Completely random - 5% missing values     | 0 - 0.001        | 0                 |
| Completely random - 10% missing values    | 0 - 0.001        | 0                 |
| Completely random - 15% missing values    | 0 - 0            | 0                 |
| Proteinwise random - no missing values    | 0 - 0.0029       | 0.0009            |
| Proteinwise random - 5% missing values    | 0 - 0.0019       | 0                 |
| Proteinwise random - 10% missing values   | 0 - 0.001        | 0                 |
| Proteinwise random - 15% missing values   | 0 - 0.001        | 0                 |
| One condition random - no missing values  | 0 - 0.001        | 0                 |
| One condition random - 5% missing values  | 0 - 0            | 0                 |
| One condition random - 10% missing values | 0 - 0            | 0                 |
| One condition random - 15% missing values | 0 - 0            | 0                 |
